# Supplementary material for: Impact of the food grade heat-killed probiotic and postbiotic oral lozenges in oral hygiene
Source: publisher site journal article supplement (doi:10.18632/aging.203923), 2022-03-02
Supplement: Supplementary file [file aging-v14i5-203923-supplementary-material-SD1.pdf]

**SUPPLEMENTARY FIGURES**

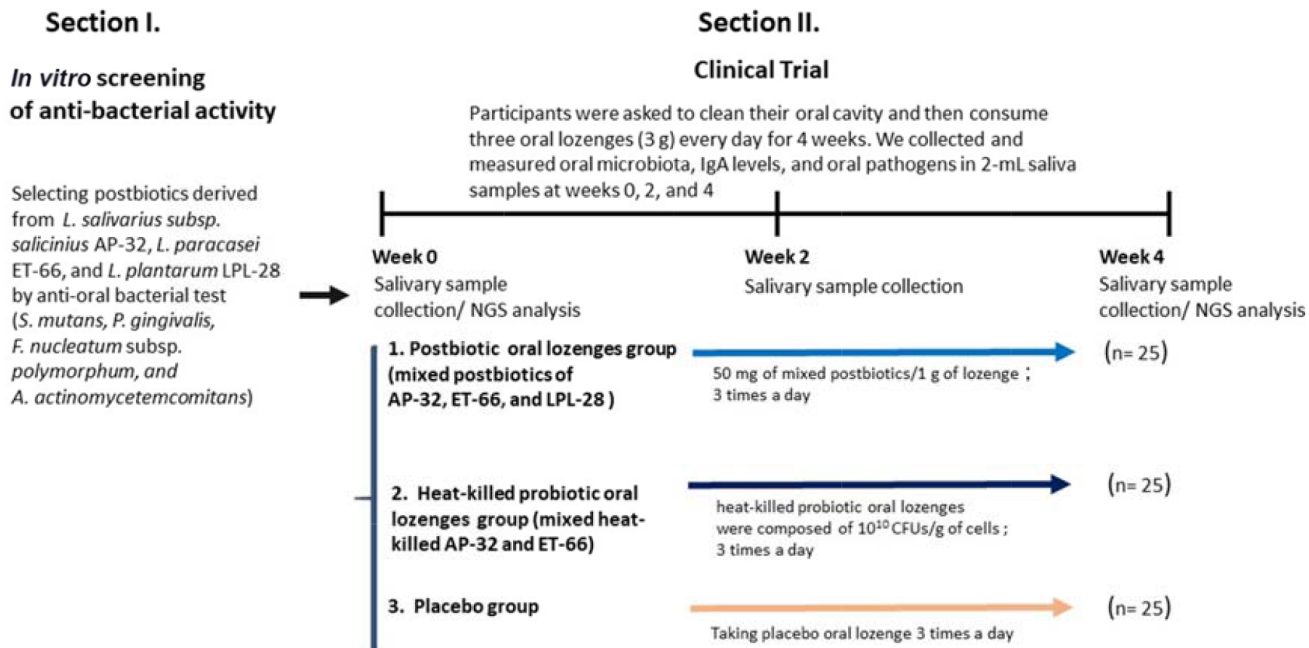

Supplementary Figure 1. Experimental design.

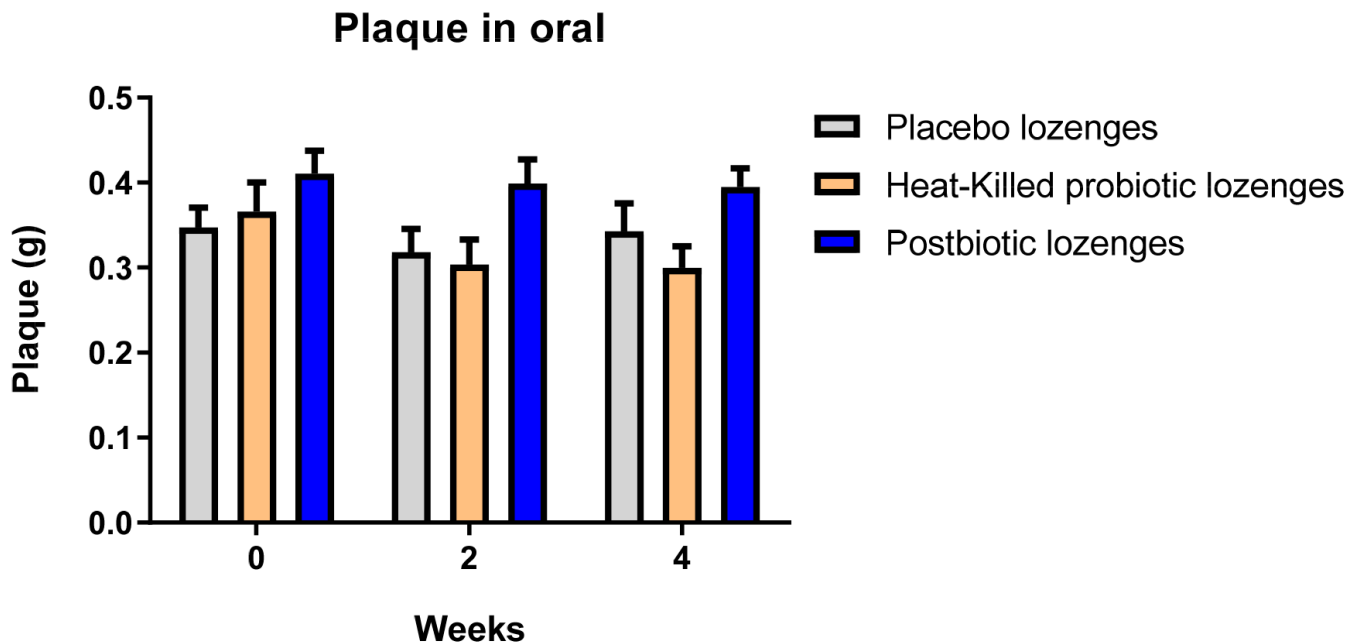

**Supplementary Figure 2. Plaque weight analyses.** The oral lozenges contained postbiotics or heat-killed cells. Participants in the control group consumed placebo lozenges without the postbiotic content (no significant difference was observed between the groups). Data are presented as mean  $\pm$  SD.

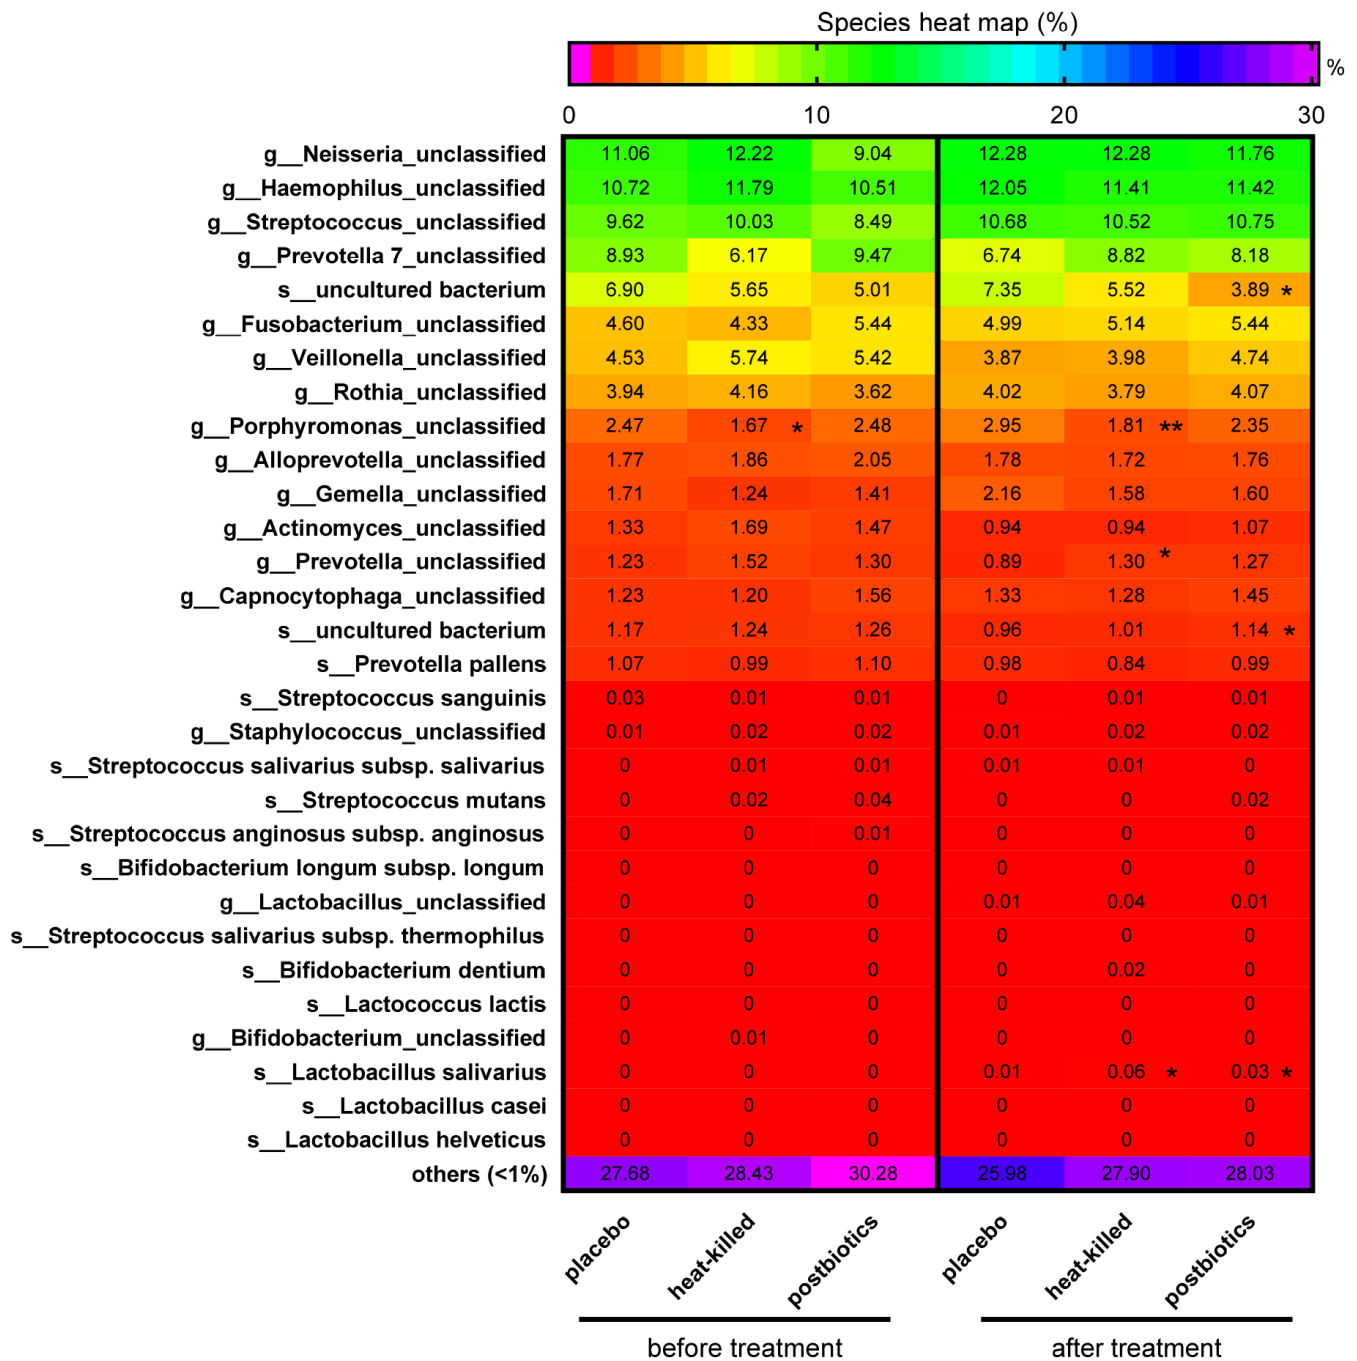

**Supplementary Figure 3. NGS for detecting changes in oral microbiota with the intervention of oral lozenges.** Heatmap presents oral microbiota changes (genus, %) in participants' saliva before and after 4 weeks of consuming oral lozenge. Participants in the control group consumed placebo lozenges without the postbiotic content (\*p < 0.05 and \*\*p < 0.01 indicate significant change compared with the placebo group). Data are presented as means.
